# Supplementary material for: Is There a Deficit in the Product and Process of Handwriting in Children with Attention‐Deficit Hyperactivity Disorder? A Systematic Review and Recommendations for Future Research
Source: Preprints.org preprint supplement (doi:10.20944/preprints202311.1547.v1), 2023-11-24
Supplement: Supplementary file 1 [file supplementary]

## Sheet: Feuil1
Study	Participants (ADHD and Controls)	Experimental Group	Mean Age (SD)	Gender (Male, Female)	Control Group	Mean Age (SD)	Gender	Inclusion and Exclusion Criteria for ADHD	ADHD Presentation	Medication (Psychostimulant)	Handwriting Measures	Main Results
Adi-Japha et al., 2007	40	20	12.2 (5.7)	20 M	20	12.8 (3.6)	20 M	Inclusion criteria: formal diagnosis of ADHD, IQ score > 85, performance within 1.6 SD on a reading test; Exclusion criteria: reading problems	ADHD/C	Off-state for at least a week before the experiment	Graphic production on a digitizing tablet; Letters production	ADHD children made more errors regarding letter insertions, substitutions, transpositions and omissions, produced confused shaped letters and replaced end-of-word letter with its simpler and more common middle-of-the-word version; Speed of handwriting did not differ between groups; No difference considering spatial features; ADHD children displayed poor time utilization, produced inconsistent and…
Åsberg Johnels et al., 2014	55	20	10 to 16	20 F	35	10 to 16	35 F	Inclusion criteria: formal diagnosis of ADHD, IQ score > 69; Exclusion criteria: ASD, neuropsychiatric and neurodevelopmental disorders, learning disabilities	n.s	No medication	FTF; Parental ratings	ADHD children obtained lower scores on parental ratings of handwriting
Borella et al., 2011	30	15	9.3 (1.4)	12 M; 4 F	15	9.4 (1.4)	12 M; 3 F	Inclusion criteria: formal diagnosis of ADHD; Exclusion criteria: IQ score < 85, MPH medication, learning disability, mathematical or reading disorders, neurological, sensory, motor, psychiatric or mood disorders	5 ADHD/I; 10 ADHD/C	No medication	Batteria per la valutazione delle competenze ortograﬁche nella scuola dell’obbligo; Continuous letters production	ADHD children produced fewer writing sequences than control groups; ADHD children showed greater IIV than control groups
Capodieci et al., 2018	32	16	10.5 (6.9)	12 M; 4 F	16	10.1 (6.4)	12 M; 4 F	Inclusion criteria: formal diagnosis of ADHD for only one child, all others on the basis of ad-hoc questionnaire; Exclusion criteria: neurological, psychiatric or serious psychological problems; No child had a learning disability	n.s	No medication	BVSCO-2; Words production	No difference between groups considering handwriting speed; In condition without WM interference, ADHD children produced about 10 % fewer graphemes than control groups; In spatial condition, diﬀerence between groups was slightly greater (- 20 %), though not statistically signiﬁcant; In verbal condition, ADHD children wrote signiﬁcantly more slowly (- 38 %) than control groups; Handwriting of ADHD…
Capodieci et al., 2019	52	26	9.6 (1.2)	22 M; 4 F	26	9.3 (1.1)	n.s	Inclusion criteria: formal diagnosis of ADHD for all but 3 children; Exclusion criteria: neurological or psychological problems, learning disorders	10 ADHD/I; 10 ADHD/C; 6 ADHD/HI	No medication	BVSCO-2; Dictation tasks; Sentences and words production; Handwriting Legibility Scale	ADHD children made more spelling mistakes than control groups in all conditions; ADHD children who better coped with a concurrent verbal WM load had better spelling performance; ADHD children obtained lower scores for handwriting quality than control groups; No difference between groups in terms of writing speed
Dirlokov et al., 2017	167	45	9.9 (1.2)	39 M; 6 F	65	9.9 (1.1)	56 M; 9 F	Inclusion criteria: formal diagnosis of ADHD; Exclusion criteria: intellectual disability, seizure, neurological, chronic medical, genetic, psychiatric (except ODD), speech-related, autistic and psychotic disorders	7 ADHD/I; 38 ADHD/C	Off-state for at least 24 hrs before the experiment	MHA; Copy task	ADHD children showed worse letter-form scores compared to control groups across conditions (copy, trace, fast trace); No difference in letter-spacing errors between groups; ADHD children made fewer speed inflections across conditions compared to control groups; Both groups showed a significant correlation between letter form and WM performance in the copy condition only
Farhangnia et al., 2020	48	24	8.0 (0.7)	17 M; 7 F	24	8.1 (0.6)	17 M; 7 F	n.s	n.s	n.s	PHAT; Copy task and dictation task	In the copy task, ADHD children had lower global legibility scores compared to control groups; No significant difference between the two groups for space, alignment, size of letters and slant components of writing as well as for speed of writing; In the dictation task, ADHD children had lower legibility score compared to control groups while there was no difference between the groups in terms of …
Flapper et al., 2006	24	12	9.8 (1.7)	11 M; 1 F	12	9.7 (1.2)	11 M; 1 F	Inclusion criteria: formal diagnosis of ADHD+DCD; Exclusion criteria: learning , neurological or psychiatric disorders, IQ score < 70	6 ADHD/I; 4 ADHD/C; 2 ADHD/HI	Off-state for the first assessment; On-state for 4 to 5 weeks for the second assessment	BHK; Copy task	ADHD+DCD children showed lower scores on quality of handwriting but there was no difference in speed of handwriting between groups; When on-state, of the 11 children with ADHD+DCD who could be assessed a second time, 6 improved their handwriting quality on the BHK, 4 did not improve and one child deteriorated; When assessed off-state, ADHD+DCD children did not improve their handwriting speed
Frings et al., 2010	21	10	12.3 (1.3)	10 M	11	12.1 (1.8)	9 M; 2 F	Inclusion criteria: formal diagnosis of ADHD	10 ADHD/C	On-state	Copy task	Mean letter height did not differ between groups; Letter height increased during repeated writing of the same sentence in the ADHD group only
Hung & Chang, 2022	60	30	7.1 (0.5)	16 M; 14 F	30	7.2 (0.5)	16 M; 14 F	Inclusion criteria: formal diagnosis of ADHD; Exclusion criteria: ASD, seizure disorder, IQ < 80, mental retardation, mood disorders, anxiety or psychotic disorders	9 ADHD/I; 18 ADHD/C; 3 ADHD/HI	n.s	BCBL; Copy task and dictation task	ADHD children had poorer writing performance than the control groups in both character dictation and character copying; ADHD children wrote less fluently and correctly compared to the control groups; Inattention was the stronger predictor of character dictation in ADHD children; Manual dexterity was significantly correlated with character copying in the ADHD group
Johnson et al., 2013	35	14	11.0 (1.95)	14 M	21	11.0 (2.1)	21 M	Inclusion criteria: formal diagnosis of ADHD; Exclusion criteria: medical, sensory, genetic or neurodevelopmental disorders, intellectual disability	14 ADHD/C	Off-state at least 24 to 72 hrs before the experiment	HPT; Copy task	ADHD children made more total handwriting errors than control groups (i.e. correction and formation errors); No difference between groups in average height or width; No difference in the coefficient of variability of phrase height and width; No difference in average word spacing; ADHD children included additional strokes more often than control groups; There was a trend towards significant differ…
Langmaid et al., 2014	28	14	10.9 (2.0)	14 M	14	10.6 (2.3)	14 M	Inclusion criteria: formal diagnosis of ADHD; Exclusion criteria: medical, sensory, genetic or neurodevelopmental disorders, intellectual disability	14 ADHD/C	Off-state at least 24 to 72 hrs before the experiment	Cursive letters production on a digitizing tablet	ADHD children were more variable in terms of stroke length and showed inconsistent stroke height when compared to the control groups; No difference in the other kinematic variables; Symptom severity scores were correlated to variability of stroke height (vertical size); Higher scores on the inattentive and total ADHD subtests were significantly correlated with more variable writing size; Stroke d…
Langmaid et al., 2016	28	14	10.8 (2.0)	14 M	14	10.5 (2.2)	14 M	Inclusion criteria: formal diagnosis of ADHD; Exclusion criteria: medical, sensory, genetic, neurodevelopmental disorders, intellectual disability	14 ADHD/C	Off-state at least 24 to 72 hrs before the experiment	Cursive letters production at 10 mm and 40 mm on a digitizing tablet	Despite both groups being significantly more inaccurate on the 40 mm task compared to 10 mm, ADHD children were unable to maintain the size of their cursive letter at the 40 mm size contrary to control groups; Groups were comparable on the 10 mm task; ADHD children had more ballistic movements on both tasks; Only pen pressure was positively correlated with inattention scores during the 10 mm task
Laniel et al., 2020	25	12	9.5 (1.1)	8 M; 4 F	12	9.9 (1.3)	6 M; 6 F	Inclusion criteria: formal diagnosis of ADHD; Exclusion criteria: intellectual disability; One child had ODD and anxiety disorder, another had dyspraxia	n.s	On-state	BHK; Copy task; Pen-stroke test on a digitizing tablet	ADHD children showed poorer performance on quality scores (BHK), lower writing speed and higher writing size than control groups; On the Pen-stroke test, ADHD children displayed poorer motor planning and execution and greater variability in motor control than the control groups; In the ADHD group only, motor planning on the handwriting task correlated with speed of handwriting on BHK (the faster …
Lofty et al., 2011	40	20	7.8 (1.2)	n.s	20	7.8 (1.2)	20 M	Inclusion criteria: formal diagnosis of ADHD; Exclusion criteria: sensory or psychiatric disorders; 60 % of included children met criteria for dyslexia	n.s	n.s	DDS; Copy task	10 % of ADHD children had normal handwriting with no disability, 40% had excellent handwriting with a minimum of disability and 50% of ADHD children showed mild to moderate handwriting disability; ADHD children had poorer performance in respecting lines, spacing between words, letter direction, spelling a sentence and punctuation (item of the DDS); No difference between males and females in the A…
Okuda et al., 2011	22	11	8.6 to 11.6	11 M	11	n.s	n.s	Inclusion criteria: formal diagnosis of ADHD; Exclusion criteria: sensory or psychiatric disorders	n.s	On-state	Scale of Dysgraphia	ADHD children manifested poorer performance regarding flowing lines, descending lines, retouched letters, curvatures and angles of "m", "n" and "u" letters; They produced more collisions and adherences, sudden movements, irregular size and incorrect form of letters
Rosenblum et al., 2008	24	12	8 to 10	10 M; 2 F	12	8 to 10	10 M; 2 F	Inclusion criteria: formal diagnosis of ADHD; Exclusion criteria: other medical diagnosis	n.s	On-state	HHE on a digitizing tablet; Copy task	Poorer performance of ADHD children when off-state versus on-state on most handwriting process and product measures; When off-medication, ADHD children showed more total time and more in-air time than when on-medication and compared to control groups; No difference in handwriting speed when compared on-state and off-state while on-state and off-state ADHD children wrote faster than control groups…
Shen et al., 2012	42	21	8.5 (1.2)	17 M; 4 F	21	8.5 (1.0)	17 M; 4 F	Inclusion criteria: formal diagnosis of ADHD, with possible ODD and CD in the ADHD group; Exclusion criteria: epilepsy, severe anxiety, psychotic disorder, DCD (score < 15th centile on M-ABC 2)	6 ADHD/I; 10 ADHD/C; 5 ADHD/HI	Off-state at least 24 hrs before the experiment	THPS; BRWT; Copy task and dictation task on a digitizing tablet	ADHD children scored lower on THSPC and on BSRWT; Despite speed of writing per se being no different between the two groups, ADHD children spent more on-paper time on the copy task and hence needed more time to end a copy task
Tucha & Lange, 2001	42	21	10.7 (0.4)	21 M	21	10.5 (0.4)	21 M	Inclusion criteria: formal diagnosis of ADHD, with medication; Exclusion criteria: concurrent psychotropic medications, ADHD/I and ADHD/HI, reading disability or spelling disorder; Four children had mathematics disability	21 ADHD/C	Off-state at least 10 hrs before experiment and on-state 1 hr after the administration	Copy task and dictation task on a digitizing tablet	When off-state, the quality of handwriting specimens of hyperactive boys was poorer than on-state but more fluent; When off-state, ADHD children did not differ from control groups in handwriting movements; Hyperactive behavior improvement through MPH was associated with increased legibility and greater accuracy of handwriting
Tucha & Lange, 2004	20	10	9.9 (n.s)	5 M; 5 F	10	9.9 (n.s)	5 M; 5 F	Inclusion criteria: formal diagnosis of ADHD, with possible ODD and CD in the ADHD group; Exclusion criteria: neurological and psychiatric disorders	n.s	On-state	Sentences production on a digitizing tablet	When on-state, ADHD children displayed significantly more inversions in the direction of their velocity profiles than control groups; When off-state, there was no difference between the groups; The medication resulted in increased dysfluency during handwriting
Yoshimasu et al., 2011	5699	379	10.4 (4.6)	284 M; 95 F	5320	n.s	2666 M; 2654 F	Inclusion criteria: retrospective cohort-based study which has sought formal diagnosis of ADHD (based on DSM criteria); Exclusion criteria: IQ score < 50, written language disorder with or without reading disability	n.s	Possible medication	Information retrieved from individualized education program goals for written language and/or specific writing subtest scores ≤ 90; Legibility and/or writing subtest scores	ADHD girls tended to have a single specific writing difficulty whereas ADHD boys were more likely to have multiple writing difficulties (e.g. legibility + poor paragraph organization)
